# Supplementary material for: Blast sampling for structural and functional analyses
Source: PubMed Central journal article supplement (PMC1819393; doi:10.1186/1471-2105-8-62), 2007-02-23

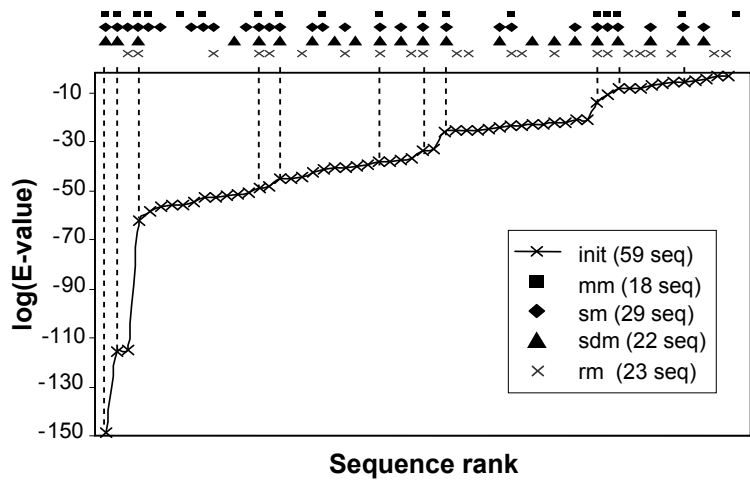

Supplement: 1471-2105-8-62-S1.pdf [file 1471-2105-8-62-S1.pdf]
