# Supplementary material for: Blast sampling for structural and functional analyses
Source: Springer Nature journal article supplement (doi:10.1186/1471-2105-8-62), 2007-02-23
Supplement: Additional file 3 [file 1471-2105-8-62-s3.pdf]

---

|                                                                            | <b>Se</b> | <b>Sp</b> | <b>G-mean</b> |
|----------------------------------------------------------------------------|-----------|-----------|---------------|
| init                                                                       | 0.79      | 0.85      | 0.82          |
| mm                                                                         | 0.74      | 0.91      | 0.82          |
| <b>subset+500</b><br><b>(threshold = 80%)</b><br><b>79 proteins</b><br>sdm | 0.68      | 0.91      | 0.79          |
| sm                                                                         | 0.84      | 0.86      | 0.85          |
| rm                                                                         | 0.57      | 0.92      | 0.72          |

---
